# Supplementary material for: Impact of sample processing delays on plasma markers of inflammation, chemotaxis, cell death, and blood coagulation
Source: PubMed Central journal article supplement (PMC11527306; doi:10.1371/journal.pone.0311921), 2024-10-31
Supplement: pone.0311921.s003.pdf [file pone.0311921.s003.pdf]

### Supplemental Table 1

|                                     | P1     | P2           | P3                           | P4                          | P5        | P6        | P7        | P8        | P9                      |
|-------------------------------------|--------|--------------|------------------------------|-----------------------------|-----------|-----------|-----------|-----------|-------------------------|
| Sex                                 | F      | F            | M                            | F                           | F         | F         | M         | M         | F                       |
| Admission Diagnosis                 | Trauma | Ruptured AAA | Sepsis                       | Trauma                      | AKI       | GI Bleed  | Trauma    | ICH       | Sepsis                  |
| SOFA score                          | 1      | 8            | 3                            | 7                           | 4         | 5         | 1         | 0         | 3                       |
| Mechanical Ventilation              | No     | Yes          | Yes                          | No                          | No        | Yes       | Yes       | Yes       | No                      |
| Vasopressors                        | No     | Yes          | Yes                          | No                          | Yes       | Yes       | Yes       | Yes       | Yes                     |
| Dialysis                            | No     | No           | No                           | No                          | Yes       | No        | No        | No        | No                      |
| Fibrinogen (g/L)                    | 2.5    | 1.3          | 3.8                          | 1.8                         | N.D.      | N.D.      | 2.5       | N.D       | 3.7                     |
| Lactate (mM)                        | 5.9    | 5.7          | 2.0                          | 2.2                         | 0.6       | 13.4      | 2.6       | 2.5       | 2.0                     |
| WBC (10 <sup>9</sup> /L)            | 22.3   | 15.7         | 13.8                         | 14.2                        | 8.4       | 18.3      | 10.9      | 14.3      | 37.3                    |
| Platelet Count (10 <sup>9</sup> /L) | 137    | 78           | 216                          | 122                         | 241       | 73        | 190       | 294       | 37                      |
| Antibiotics                         | No     | Yes          | Yes                          | Yes                         | No        | Yes       | Yes       | No        | Yes                     |
| Blood culture                       | N.D.   | N.D.         | <i>Klebsiella pneumoniae</i> | <i>Klebsiella aerogenes</i> | No growth | No growth | No growth | No growth | <i>Escherichia coli</i> |
