# Supplementary material for: Impact of sample processing delays on plasma markers of inflammation, chemotaxis, cell death, and blood coagulation
Source: PubMed Central journal article supplement (PMC11527306; doi:10.1371/journal.pone.0311921), 2024-10-31
Supplement: pone.0311921.s004.pdf [file pone.0311921.s004.pdf]

**Supplemental Table 2**  
**Multiplex cytokine levels in EDTA plasma samples from ICU patients**

| <b>Sample ID</b> | <b>IFN-<math>\gamma</math> (pg/mL)</b> | <b>IL-6 (pg/mL)</b> | <b>IL-10 (pg/mL)</b> | <b>TNF (pg/mL)</b> |
|------------------|----------------------------------------|---------------------|----------------------|--------------------|
| Normal Range     | 0.46-22.8                              | 0.12-0.99           | 0.09-2.71            | 0.31-2.32          |
| P1-E-RT 0        | 1.82                                   | 45.06               | 5.85                 | 0.18               |
| P1-E-RT 24       | 1.24                                   | 41.64               | 6.17                 | 0.24               |
| P1-E-RT 48       | below curve fit                        | 42.81               | 5.13                 | 0.43               |
| P1-E-RT 72       | 0.96                                   | 42.02               | 5.08                 | 1.25               |
| P2-E-RT 0        | 21.08                                  | 9340.06             | 91.51                | 2.28               |
| P2-E-RT 24       | 40.52                                  | 9790.77             | 90.93                | 1.89               |
| P2-E-RT 48       | 18.67                                  | 9205.19             | 77.15                | 1.40               |
| P2-E-RT 72       | 24.80                                  | 8647.18             | 65.46                | 1.69               |
| P3-E-RT 0        | 4.25                                   | 319.82              | 174.40               | 15.46              |
| P3-E-RT 24       | 5.19                                   | 310.56              | 166.59               | 13.09              |
| P3-E-RT 48       | 2.59                                   | 330.59              | 162.67               | 13.07              |
| P3-E-RT 72       | 2.85                                   | 328.43              | 162.21               | 12.56              |
| P4-E-RT 0        | 1.43                                   | 73.70               | 99.95                | 1.93               |
| P4-E-RT 24       | 3.68                                   | 67.16               | 90.73                | 1.70               |
| P4-E-RT 48       | 1.76                                   | 59.79               | 86.00                | 1.73               |
| P4-E-RT 72       | 0.84                                   | 61.00               | 85.60                | 1.82               |
| P5-E-RT 0        | 7.99                                   | 6.38                | 0.42                 | 0.58               |
| P5-E-RT 24       | 7.87                                   | 6.13                | 0.37                 | 0.43               |
| P5-E-RT 48       | 9.35                                   | 6.82                | 0.41                 | 0.78               |
| P5-E-RT 72       | 8.37                                   | 6.77                | 0.33                 | 0.74               |
| P6-E-RT 0        | 23.72                                  | 282.15              | 12.02                | 2.62               |
| P6-E-RT 24       | 18.25                                  | 265.71              | 12.06                | 2.58               |
| P6-E-RT 48       | 15.65                                  | 249.65              | 10.66                | 2.02               |
| P6-E-RT 72       | 15.28                                  | 232.54              | 9.32                 | 2.09               |
| P7-E-RT 0        | below curve fit                        | 18.20               | 0.65                 | 0.06               |
| P7-E-RT 24       | 1.43                                   | 16.26               | 0.79                 | 0.08               |
| P7-E-RT 48       | 1.17                                   | 16.11               | 0.71                 | 0.16               |
| P7-E-RT 72       | 1.89                                   | 17.36               | 0.88                 | 0.27               |
| P8-E-RT 0        | 3.99                                   | 22.48               | 1.75                 | 0.39               |
| P8-E-RT 24       | 3.36                                   | 15.56               | 1.68                 | 0.32               |
| P8-E-RT 48       | 2.66                                   | 14.63               | 1.47                 | 0.57               |
| P8-E-RT 72       | 4.31                                   | 13.60               | 1.34                 | 0.72               |
| P9-E-RT 0        | 6.69                                   | 36.88               | 5.32                 | 3.78               |
| P9-E-RT 24       | 6.50                                   | 37.69               | 5.53                 | 4.31               |
| P9-E-RT 48       | 5.44                                   | 35.24               | 5.05                 | 4.19               |
| P9-E-RT 72       | 4.44                                   | 34.95               | 4.50                 | 4.47               |
