# Supplementary material for: Impact of sample processing delays on plasma markers of inflammation, chemotaxis, cell death, and blood coagulation
Source: PubMed Central journal article supplement (PMC11527306; doi:10.1371/journal.pone.0311921), 2024-10-31
Supplement: pone.0311921.s005.pdf [file pone.0311921.s005.pdf]

**Supplemental Table 3**  
**Multiplex chemokine levels in EDTA plasma samples from ICU patients**

| Sample ID    | MIP-1 $\beta$<br>(pg/mL) | IP-10<br>(pg/mL) | MIP-1 $\alpha$<br>(pg/mL) | IL-8<br>(pg/mL) | MCP-1<br>(pg/mL) | MCP-4<br>(pg/mL) |
|--------------|--------------------------|------------------|---------------------------|-----------------|------------------|------------------|
| Normal Range | 7.99-153                 | 102 - 676        | 11.3 - 651                | 347 - 2478      | 42.3 - 185       | 29.5 - 136       |
| P1-E-RT 0    | 41.94                    | 201.05           | 8.98                      | 1634.16         | 188.77           | 41.70            |
| P1-E-RT 24   | 45.78                    | 227.65           | 8.06                      | 1906.20         | 178.6            | 56.40            |
| P1-E-RT 48   | 44.87                    | 206.60           | 7.42                      | 5524.06         | 161.71           | 54.84            |
| P1-E-RT 72   | 54.99                    | 252.40           | 8.34                      | 24371.96        | 189.51           | 68.59            |
| P2-E-RT 0    | 132.9                    | 1659.81          | 31.93                     | 1684.76         | 624.49           | 20.24            |
| P2-E-RT 24   | 76.43                    | 1657.09          | 31.75                     | 1338.78         | 473.63           | 15.12            |
| P2-E-RT 48   | 77.06                    | 1595.51          | 31.47                     | 1123.41         | 504.21           | 15.76            |
| P2-E-RT 72   | 66.89                    | 1958.50          | 27.66                     | 1417.32         | 565.07           | 16.85            |
| P3-E-RT 0    | 4283.75                  | 1132.95          | 249.7                     | 2080.44         | 2229.8           | 96.65            |
| P3-E-RT 24   | 4234.76                  | 1023.83          | 265.1                     | 867.07          | 2425.13          | 127.49           |
| P3-E-RT 48   | 4785.55                  | 1296.50          | 257.52                    | 677.86          | 3102.85          | 138.79           |
| P3-E-RT 72   | 5333.61                  | 1383.52          | 255.33                    | 3881.68         | 3318.61          | 141.67           |
| P4-E-RT 0    | 344.81                   | 244.68           | 64.44                     | 1213.31         | 758.29           | 42.13            |
| P4-E-RT 24   | 252.18                   | 237.87           | 59.19                     | 1051.92         | 682.04           | 40.90            |
| P4-E-RT 48   | 284.77                   | 282.50           | 60.45                     | 3087.35         | 721.50           | 42.79            |
| P4-E-RT 72   | 287.90                   | 323.67           | 74.51                     | 314.39          | 850.03           | 48.62            |
| P5-E-RT 0    | 76.16                    | 210.66           | 20.49                     | 1100.00         | 153.39           | 75.46            |
| P5-E-RT 24   | 80.63                    | 177.81           | 19.52                     | 1546.84         | 118.13           | 74.86            |
| P5-E-RT 48   | 99.23                    | 190.60           | 20.54                     | 677.86          | 121.02           | 82.00            |
| P5-E-RT 72   | 108.52                   | 194.43           | 25.19                     | 1651.17         | 114.26           | 89.22            |
| P6-E-RT 0    | 522.23                   | 1700.22          | 42.71                     | 1473.97         | 406.07           | 49.13            |
| P6-E-RT 24   | 503.55                   | 1387.69          | 41.80                     | 1100.00         | 332.26           | 38.12            |
| P6-E-RT 48   | 450.70                   | 1400.75          | 44.79                     | 1750.36         | 345.58           | 37.15            |
| P6-E-RT 72   | 371.55                   | 1366.94          | 43.80                     | 1750.36         | 345.56           | 38.16            |
| P7-E-RT 0    | 137.96                   | 208.68           | 12.57                     | 1436.41         | 53.41            | 16.87            |
| P7-E-RT 24   | 132.41                   | 200.20           | 10.39                     | 1169.07         | 37.27            | 31.51            |
| P7-E-RT 48   | 141.69                   | 244.78           | 12.39                     | 1950.95         | 38.69            | 47.13            |
| P7-E-RT 72   | 140.99                   | 202.09           | 13.3                      | 1734.15         | 31.17            | 33.93            |
| P8-E-RT 0    | 55.38                    | 116.77           | 11.59                     | 1528.89         | 42.72            | 19.58            |
| P8-E-RT 24   | 78.57                    | 125.70           | 11.28                     | 1100.00         | 32.75            | 35.63            |
| P8-E-RT 48   | 106.99                   | 172.77           | 12.16                     | 2163.22         | 37.96            | 53.70            |
| P8-E-RT 72   | 123.74                   | 169.43           | 13.93                     | 1455.29         | 29.73            | 53.08            |
| P9-E-RT 0    | 103.75                   | 927.49           | 73.67                     | 1766.45         | 165.28           | 30.92            |
| P9-E-RT 24   | 105.09                   | 816.81           | 67.05                     | 1492.46         | 146.97           | 28.72            |
| P9-E-RT 48   | 154.54                   | 978.30           | 64.79                     | 2052.24         | 143.37           | 31.73            |
| P9-E-RT 72   | 183.94                   | 894.97           | 68.45                     | 1256.27         | 138.97           | 28.34            |
