# Supplementary material for: Impact of sample processing delays on plasma markers of inflammation, chemotaxis, cell death, and blood coagulation
Source: PubMed Central journal article supplement (PMC11527306; doi:10.1371/journal.pone.0311921), 2024-10-31
Supplement: pone.0311921.s006.pdf [file pone.0311921.s006.pdf]

**Supplemental Table 4**  
**Cell-free DNA levels in plasma samples from ICU patients and healthy volunteers**

| <b>cfDNA in ICU patients (µg/mL)</b> |          |           |           |           |           |           |           |           |           |           |
|--------------------------------------|----------|-----------|-----------|-----------|-----------|-----------|-----------|-----------|-----------|-----------|
|                                      | Time (h) | Patient 1 | Patient 2 | Patient 3 | Patient 4 | Patient 5 | Patient 6 | Patient 7 | Patient 8 | Patient 9 |
| Citrate RT                           | 0        | 0.60      | 1.66      | 1.13      | 0.91      | 0.97      | 7.7       | 0.98      | 0.83      | 0.20      |
|                                      | 24       | 0.88      | 1.74      | 1.35      | 0.87      | 1.18      | 7.3       | 1.00      | 0.81      | 0.20      |
|                                      | 48       | 0.62      | 1.82      | 1.17      | 0.90      | 1.04      | 8         | 1.00      | 0.94      | 0.22      |
|                                      | 72       | 0.64      | 1.77      | 1.31      | 0.98      | 1.05      | 7.7       | 1.08      | 0.72      | 0.26      |
| EDTA RT                              | 0        | 0.94      | 1.56      | 1.08      | 1.76      | 1.67      | 9.8       | 1.33      | 1.40      | 0.16      |
|                                      | 24       | 0.53      | 1.82      | 1.16      | 1.92      | 1.81      | 9.7       | 1.43      | 1.52      | 0.24      |
|                                      | 48       | 0.51      | 2.03      | 1.41      | 2.07      | 1.93      | 9.4       | 1.61      | 1.53      | 0.24      |
|                                      | 72       | 0.73      | 2.30      | 1.22      | 2.29      | 1.77      | 8.5       | 1.48      | 1.41      | 0.28      |
| Citrate 4°C                          | 0        | 0.60      | 1.66      | 1.13      | 0.91      | 0.97      | 7.9       | 0.98      | 0.83      | 0.20      |
|                                      | 24       | 0.70      | 1.79      | 1.21      | 0.91      | 1.16      | 6.6       | 1.00      | 0.78      | 0.25      |
|                                      | 48       | 0.68      | 1.75      | 1.24      | 0.87      | 1.08      | 8.5       | 0.96      | 0.86      | 0.21      |
|                                      | 72       | 0.61      | 2.22      | 1.18      | 0.88      | 1.03      | 6.6       | 0.95      | 0.80      | 0.23      |
| EDTA 4°C                             | 0        |           | 1.56      | 1.08      | 1.76      | 1.67      | 9.8       | 1.33      | 1.40      | 0.16      |
|                                      | 24       |           | 1.72      | 1.15      | 1.91      | 0.68      | 9.5       | 1.36      | 1.35      | 0.23      |
|                                      | 48       |           | 2.01      | 1.04      | 2.09      | 0.77      | 9.1       | 1.48      | 1.29      | 0.16      |
|                                      | 72       |           | 2.03      | 1.03      | 1.41      | 1.72      | 9.4       | 1.24      | 0.96      | 0.24      |

| <b>cfDNA in healthy volunteers (µg/mL)</b> |          |             |             |             |             |             |             |             |
|--------------------------------------------|----------|-------------|-------------|-------------|-------------|-------------|-------------|-------------|
|                                            | Time (h) | Volunteer 1 | Volunteer 2 | Volunteer 3 | Volunteer 4 | Volunteer 5 | Volunteer 6 | Volunteer 9 |
| Citrate RT                                 | 0        | 0.68        | 0.64        | 0.45        | 0.63        | 0.65        | 0.76        | 0.55        |
|                                            | 24       | 0.61        | 0.61        | 0.65        | 0.71        | 0.64        | 0.64        | 0.51        |
|                                            | 48       | 0.62        | 0.73        | 0.69        | 0.67        | 0.64        | 0.68        | 0.50        |
|                                            | 72       | 0.59        | 0.58        | 0.61        | 0.61        | 0.44        | 0.39        | 1.26        |
| EDTA RT                                    | 0        | 0.62        | 0.59        | 0.75        | 0.79        | 0.77        | 0.75        | 0.51        |
|                                            | 24       | 0.73        | 0.68        | 0.87        | 0.76        | 0.66        | 0.66        | 0.63        |
|                                            | 48       | 1.44        | 0.96        | 0.77        | 0.73        | 0.79        | 0.71        | 0.56        |
|                                            | 72       | 0.89        | 1.12        | 0.80        | 0.60        | 0.53        | 0.65        | 0.66        |
| Citrate 4°C                                | 0        | 0.68        | 0.64        | 0.45        | 0.63        | 0.65        | 0.76        | 0.55        |
|                                            | 24       | 0.58        | 0.61        | 0.66        | 0.61        | 0.56        | 0.71        | 0.46        |
|                                            | 48       | 0.57        | 0.56        | 0.60        | 0.55        | 0.54        | 0.44        | 0.44        |
|                                            | 72       | 0.55        | 0.59        | 0.55        | 0.48        | 0.28        | 0.31        | 0.47        |
| EDTA 4°C                                   | 0        | 0.62        | 0.59        | 0.75        | 0.79        | 0.77        | 0.75        | 0.51        |
|                                            | 24       | 0.62        | 0.68        | 0.73        | 0.71        | 0.74        | 0.69        | 0.48        |
|                                            | 48       | 0.63        | 0.65        | 0.63        | 0.65        | 0.52        | 0.48        | 0.58        |
|                                            | 72       | 0.61        | 0.63        | 0.56        | 0.51        | 0.60        | 0.40        | 0.68        |
