# Supplementary material for: Impact of sample processing delays on plasma markers of inflammation, chemotaxis, cell death, and blood coagulation
Source: PubMed Central journal article supplement (PMC11527306; doi:10.1371/journal.pone.0311921), 2024-10-31
Supplement: pone.0311921.s007.pdf [file pone.0311921.s007.pdf]

**Supplemental Table 5**  
**Thrombin generation parameters in citrate plasma samples**  
**from ICU patients and healthy volunteers**

|                    | Time (h) | Volunteer 1 | Volunteer 2 | Volunteer 3 | Volunteer 4 | Volunteer 5 | Volunteer 6 |
|--------------------|----------|-------------|-------------|-------------|-------------|-------------|-------------|
| Lag Time RT (min)  | 0        | 4           | 3           | 4           | 3           | 4           | 5           |
|                    | 24       | 4           | 3           | 5           | 4           | 3           | 4           |
|                    | 48       | 3           | 4           | 5           | 4           | 3           | 5           |
|                    | 72       | 4           | 4           | 5           | 4           | 3           | 5           |
| Lag Time 4°C (min) | 0        | 3           | 3           | 4           | 3           | 4           | 5           |
|                    | 24       | 3           | 3           | 4           | 4           | 3           | 4           |
|                    | 48       | 3           | 3           | 3           | 4           | 3           | 4           |
|                    | 72       | 4           | 4           | 3           | 4           | 3           | 4           |

|                    | Time (h) | Patient 1 | Patient 2 | Patient 3 | Patient 4 | Patient 5 | Patient 6 | Patient 7 | Patient 8 |
|--------------------|----------|-----------|-----------|-----------|-----------|-----------|-----------|-----------|-----------|
| Lag Time RT (min)  | 0        | 4         | 7         | 4         | 7         | 17        | 6         | 3         | 3         |
|                    | 24       | 3         | 6         | 4         | 7         | 27        | 8         | 3         | 3         |
|                    | 48       | 3         | 8         | 4         | 8         | 29        | 9         | 3         | 3         |
|                    | 72       | 5         | 8         | 4         | 6         | 30        | 10        | 3         | 3         |
| Lag Time 4°C (min) | 0        | 4         | 7         | 4         | 7         | 17        | 6         | 3         | 3         |
|                    | 24       | 3         | 6         | 3         | 7         | 18        | 6         | 3         | 3         |
|                    | 48       | 3         | 9         | 4         | 6         | 19        | 7         | 3         | 3         |
|                    | 72       | 4         | 7         | 3         | 7         | 18        | 7         | 3         | 3         |

|                    | Time (h) | Volunteer 1 | Volunteer 2 | Volunteer 3 | Volunteer 4 | Volunteer 5 | Volunteer 6 |
|--------------------|----------|-------------|-------------|-------------|-------------|-------------|-------------|
| AUC RT (nM x min)  | 0        | 4248        | 4681        | 5380        | 4435        | 6230        | 4715        |
|                    | 24       | 3991        | 4367        | 4209        | 3968        | 5735        | 3831        |
|                    | 48       | 3925        | 4161        | 4022        | 3538        | 6497        | 3890        |
|                    | 72       | 4261        | 4355        | 4536        | 2699        | 5960        | 4143        |
| AUC 4°C (nM x min) | 0        | 4248        | 4681        | 5380        | 4435        | 6230        | 4715        |
|                    | 24       | 5681        | 4329        | 5288        | 4951        | 5913        | 3831        |
|                    | 48       | 5850        | 4162        | 5266        | 5017        | 5997        | 3890        |
|                    | 72       | 5581        | 4445        | 5098        | 3692        | 6421        | 4143        |

|                    | Time (h) | Patient 1 | Patient 2 | Patient 3 | Patient 4 | Patient 5 | Patient 6 | Patient 7 | Patient 8 |
|--------------------|----------|-----------|-----------|-----------|-----------|-----------|-----------|-----------|-----------|
| AUC RT (nM x min)  | 0        | 3931      | 1619      | 6487      | 2760      | 2880      | 2544      | 3753      | 3962      |
|                    | 24       | 3753      | 1359      | 6195      | 2049      | 1346      | 2202      | 4210      | 4361      |
|                    | 48       | 3688      | 1584      | 5187      | 1737      | 906       | 1667      | 4346      | 4194      |
|                    | 72       | 3063      | 1572      | 6202      | 1525      | 1270      | 1613      | 4375      | 4451      |
| AUC 4°C (nM x min) | 0        | 3931      | 1619      | 6487      | 2760      | 2880      | 2544      | 3753      | 3962      |
|                    | 24       | 3259      | 1579      | 3723      | 1584      | 3331      | 2104      | 4849      | 4488      |
|                    | 48       | 3642      | 1593      | 5696      | 1895      | 3310      | 2429      | 4408      | 4350      |
|                    | 72       | 3438      | 1467      | 5488      | 2344      | 3025      | 1766      | 3994      | 4064      |
